# Supplementary material for: Optimising personal continuity for older patients in general practice: a study protocol for a cluster randomised stepped wedge pragmatic trial
Source: Springer Nature journal article supplement (doi:10.1186/s12875-021-01511-y), 2021-10-20
Supplement: MOESM2 [file 19777182]

Supplement 2. Unpublished observations by van Stippend and Schers (2016)

| <b>Practice type</b>   | <b>Number of practices</b> | <b>Average usual provider continuity index</b> | <b>Standard deviation</b> |
|------------------------|----------------------------|------------------------------------------------|---------------------------|
| Single-handed practice | 2                          | 0,79                                           | 0,15                      |
| Two-handed practice    | 4                          | 0,63                                           | 0,04                      |
| Group Practice         | 3                          | 0,56                                           | 0,07                      |
| <b>Total</b>           | <b>9</b>                   | <b>0,64</b>                                    | <b>0,11</b>               |
