# Supplementary material for: Optimising personal continuity for older patients in general practice: a study protocol for a cluster randomised stepped wedge pragmatic trial
Source: Springer Nature journal article supplement (doi:10.1186/s12875-021-01511-y), 2021-10-20
Supplement: MOESM3 [file 19777182]

## Supplement 3. Description of the determinants for implementation of healthcare innovations as described by Fleuren et al.

---

### **Determinants related to the socio-political context**

---

1. Willingness of the patient to cooperate with the innovation

---

  2. Degree to which the patient is aware of the health benefits of the innovation

---

  3. Patient doubts concerning the health professional's expertise and competence with respect to the

---

  4. Financial burden of the innovation imposed on the patient (e.g. no insurance coverage)

---

  5. Patient discomfort (physical or emotional) as a result of the innovation

---

  6. The extent to which the innovation fits into existing rules, regulations, and legislation
- 

### **Determinants related to the organization**

---

7. Decision-making process and procedures in the organization: top-down or bottom-up/participatory

---

  8. Hierarchical structure: extent to which decision-making process is formalized through hierarchical

---

  9. Formal reinforcement by management to integrate innovation into organizational policies

---

  10. Organizational size (number of employees): large, medium size, small

---

  11. Functional structure (task oriented) versus product structure (output oriented)

---

  12. Relationship with other departments or organizations: introvert or outreaching

---

  13. Nature of the collaboration between departments involved in the innovation

---

  14. Staff turnover: high, average, low

---

  15. Degree of staff capacity in the organization or department that implements the innovation

---

  16. Available expertise, in relation to the innovation in the organization or department

---

  17. Logistical procedures related to the innovation, e.g. logistical problems in scheduling patients

---

  18. Number of potential users to be reached: many, few
- 

### **Determinants related to the adopting person/user/health professional**

---

---

19. Support from/of colleagues in implementing the innovation

---

20. Support from/of other health professionals in implementing the innovation

---

21. Support from/of their supervisors in the department/organization with respect to the implementation

---

22. Support from/of higher management in the organization with respect to the implementation of the

---

23. Extent to which colleagues implement the innovation (modelling)

---

24. Extent to which the health professional has the skills needed to implement the innovation

---

25. Extent to which the health professional has the knowledge needed to implement the innovation

---

26. Self-efficacy: confidence to perform the behaviour needed to implement the innovation

---

27. Extent to which ownership by the health professionals is perceived

---

28. Extent to which the innovation fits in the perceived task orientation of the health professional

---

29. Extent to which the health professional expects that the patient will cooperate in the innovation

---

30. Extent to which the health professional expects that the patient will be satisfied with the innovation

---

31. Extent to which the health professional suffers from work-related stress

---

32. Extent to which goals of health professionals with respect to the innovation are contradictory

---

33. Extent to which the health professional has ethical problems with the innovation

---

**Determinants related to the innovation**

---

34. Extent to which the procedures/guidelines of the innovation are clear

---

35. Compatibility: degree to which the innovation is perceived as consistent with existing work procedures

---

36. Trialability: extent to which the innovation can be subjected to trial

---

37. Relative advantage: extent to which the innovation is perceived as advantageous

---

38. Observability: degree to which the results of the innovations are observable to the health professional

---

39. Extent to which the innovation is appealing to use

---

40. Relevance of the innovation for the patient: extent to which the innovation has added value

---

41. Extent to which the innovation carries risks to the patient compared with the existing situation

---

---

42. Frequency of use of the innovation: high, low

---

**Determinants related to facilities needed to implement the innovation**

---

43. Financial resources made available for implementing the innovation

---

44. Reimbursement for health professionals/organizations to facilitate extra efforts in applying the

---

45. Other resources made available for implementing the innovation (e.g. equipment, manuals)

---

46. Administrative support available to the users (health professionals) of the implementation

---

47. Time available to implement the innovation

---

48. Availability of staff responsible for coordinating implementation in the organization/department

---

49. Health professionals are involved in the development of the innovation

---

50. Opinion leader who influences opinions of others in the organization or department (not the

---

Some determinants, such as reimbursement (number 44), can also be classified in another category, e.g. as a characteristic of the organization.
